# Supplementary material
Source: PubMed Central journal article supplement (PMC8546236)
Supplement: mmc1.pdf [file mmc1.pdf]

## Pulmonary Manifestations of GATA2 Deficiency

*Beatriz E. Marciano, MD; Kenneth N. Olivier, MD, MPH; Les R. Folio, DO, MPH;  
Christa S. Zerbe, MD; Amy P. Hsu, BA; Alexandra F. Freeman, MD; Armando C. Filie, MD;  
Michael A. Spinner, MD; Lauren A. Sanchez, MD; Jana P. Lovell, MD; Mark Parta, MD;  
Jennifer M. Cuellar-Rodriguez, MD; Dennis D. Hickstein, MD; and Steven M. Holland, MD*

CHEST 2021; 160(4):1350-1359

*Online supplements are not copyedited prior to posting and the author(s) take full responsibility for the accuracy of all data.*

© 2021 AMERICAN COLLEGE OF CHEST PHYSICIANS. Reproduction of this article is prohibited without written permission from the American College of Chest Physicians. See online for more details. DOI: 10.1016/j.chest.2021.05.046

**e-Figure 1.** Immunological profile in probands and relatives at the pulmonary evaluation. expressed in median and interquartile. Grays are normal values.

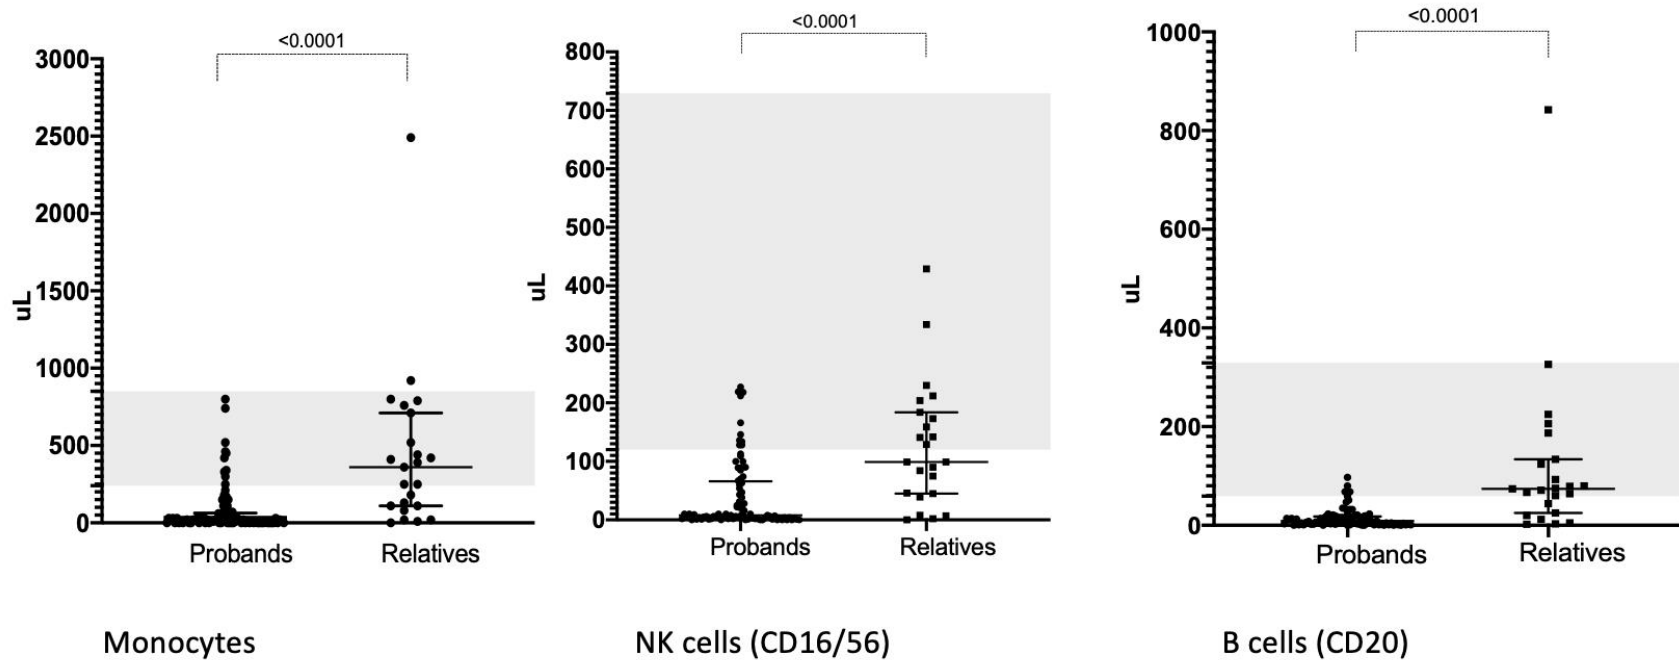

Immunological profile differences between probands and relatives (median IQ)  
P value=  $p<0.001$

**e-Table 1.** Infections in GATA2 patients.  
Frequency of different organism in GATA2 deficient with and without pulmonary alveolar proteinosis.

| Organisms isolated    | Species                            | Patients without PAP<br>(n=113) | Patients with PAP<br>(n=11) |
|-----------------------|------------------------------------|---------------------------------|-----------------------------|
| <i>Mycobacteria</i> * |                                    | <b>33 (30%)</b>                 | <b>9 (81%)</b>              |
|                       | <i>M. kansasii</i>                 | 13(11%)                         | 2(2%)                       |
|                       | <i>M. avium</i> complex            | 13(11%)                         | 5(5%)                       |
|                       | <i>M. abscessus</i>                |                                 | 1(1%)                       |
|                       | <i>M. bolletti</i>                 | 1(<1%)                          |                             |
|                       | <i>M. fortuitum</i>                | 5(5%)                           | 2(2%)                       |
|                       | <i>M. szulgai</i>                  | 1(<1%)                          |                             |
|                       | No speciation                      | 2(2%)                           | 2(2%)                       |
|                       | <i>M. tuberculosis</i>             | 3(3%)                           |                             |
|                       |                                    |                                 |                             |
| Fungi                 |                                    | <b>21 (18%)</b>                 | <b>6 (7%)</b>               |
|                       | <i>Aspergillus sp</i> <sup>†</sup> | 2(2%)                           | 4(4%)                       |
|                       | <i>Histoplasma</i>                 | 3(3%)                           | 2(2%)                       |
|                       | <i>Candida</i> <sup>‡</sup>        | 13(11%)                         |                             |
|                       | <i>Blastomyces</i>                 | 2(2%)                           |                             |
|                       |                                    |                                 |                             |
| Viruses               |                                    | <b>77 (68%)</b>                 | <b>9 (100%)</b>             |
|                       | HSV                                | 8 (7%)                          |                             |
|                       | HPV                                | 59 <sup>  </sup> (52%)          | 7 <sup>  </sup> (8%)        |
|                       | Varicella                          | 7 (6%)                          | 1 <sup>**</sup> (1%)        |
|                       | CMV                                | 4 (3%)                          | 2 (2%)                      |
|                       | EBV                                | 12 (10%)                        |                             |

\* More than one species isolated in some patients.

† *A. fumigatus* and one case of *A. neosartorya*

‡ Noninvasive (oral or vulvovaginitis)

|| Including warts

\*\* Varicella-zoster infection

**e-Table 2.** Heat map of radiographic findings in GATA2 deficiency probands and relatives grouped according to mutation type.

| ID         | Published | Patients | Age | Nodules | Reticular | Paraseptal Emphysema | Ground-glass opacity | Consolidation | Crazy paving | Mutation type |
|------------|-----------|----------|-----|---------|-----------|----------------------|----------------------|---------------|--------------|---------------|
| 378.I.1    | *         | Proband  | 12  |         |           |                      |                      |               |              | Missense      |
| 141.I.1    | *         | Proband  | 16  |         |           |                      |                      |               |              | Missense      |
| 15.I.1     | *         | Proband  | 16  |         |           |                      |                      |               |              | Missense      |
| 34.II.2    | *         | Proband  | 16  |         |           |                      |                      |               |              | Missense      |
| 351.I.1    | *         | Proband  | 17  |         |           |                      |                      |               |              | Missense      |
| 1.IV.1     |           | Proband  | 17  |         |           |                      |                      |               |              | Missense      |
| 277.I.1    | *         | Proband  | 18  |         |           |                      |                      |               |              | Missense      |
| 357.II.1   | *         | Proband  | 18  |         |           |                      |                      |               |              | Missense      |
| 360.I.1    | *         | Proband  | 20  |         |           |                      |                      |               |              | Missense      |
| 19.II.1    | *         | Proband  | 21  |         |           |                      |                      |               |              | Missense      |
| 382.I.2    | *         | Proband  | 22  |         |           |                      |                      |               |              | Missense      |
| 270.I.1    | *         | Proband  | 22  |         |           |                      |                      |               |              | Missense      |
| 383.II.1   | *         | Proband  | 22  |         |           |                      |                      |               |              | Missense      |
| 400        |           | Proband  | 22  |         |           |                      |                      |               |              | Missense      |
| 9.II.1     | *         | Proband  | 22  |         |           |                      |                      |               |              | Missense      |
| 18.I.2     | *         | Proband  | 23  |         |           |                      |                      |               |              | Missense      |
| 51.III.1   | *         | Proband  | 24  |         |           |                      |                      |               |              | Missense      |
| 42.I.1     | *         | Proband  | 24  |         |           |                      |                      |               |              | Missense      |
| 312.I.1    | *         | Proband  | 24  |         |           |                      |                      |               |              | Missense      |
| 256.I.1    | *         | Proband  | 25  |         |           |                      |                      |               |              | Missense      |
| 324.I.1    | *         | Proband  | 27  |         |           |                      |                      |               |              | Missense      |
| 281.I.1    | *         | Proband  | 28  |         |           |                      |                      |               |              | Missense      |
| 12.I.1     | *         | Proband  | 28  |         |           |                      |                      |               |              | Missense      |
| 349.IV.5   | *         | Proband  | 30  |         |           |                      |                      |               |              | Missense      |
| 339.I.1    | *         | Proband  | 31  |         |           |                      |                      |               |              | Missense      |
| 146.I.1    | *         | Proband  | 32  |         |           |                      |                      |               |              | Missense      |
| 351.I.1    | *         | Proband  | 32  |         |           |                      |                      |               |              | Missense      |
| 31.II.1    | *         | Proband  | 33  |         |           |                      |                      |               |              | Missense      |
| 21.II.1    | *         | Proband  | 33  |         |           |                      |                      |               |              | Missense      |
| 37.I.1     | *         | Proband  | 35  |         |           |                      |                      |               |              | Missense      |
| 17.I.1     | *         | Proband  | 36  |         |           |                      |                      |               |              | Missense      |
| 402        |           | Proband  | 37  |         |           |                      |                      |               |              | Missense      |
| 35.III.3   | *         | Proband  | 37  |         |           |                      |                      |               |              | Missense      |
| 365.I.1    | *         | Proband  | 38  |         |           |                      |                      |               |              | Missense      |
| 10.I.1     | *         | Proband  | 38  |         |           |                      |                      |               |              | Missense      |
| 216.I.1    | *         | Proband  | 38  |         |           |                      |                      |               |              | Missense      |
| 2.II.3     | *         | Proband  | 40  |         |           |                      |                      |               |              | Missense      |
| 384.I.1    | *         | Proband  | 40  |         |           |                      |                      |               |              | Missense      |
| 5.I.1      | *         | Proband  | 41  |         |           |                      |                      |               |              | Missense      |
| 384.I.1    | *         | Proband  | 41  |         |           |                      |                      |               |              | Missense      |
| 218.I.1    | *         | Proband  | 44  |         |           |                      |                      |               |              | Missense      |
| 1.II.1     | *         | Proband  | 45  |         |           |                      |                      |               |              | Missense      |
| 52.I.4     | *         | Proband  | 45  |         |           |                      |                      |               |              | Missense      |
| 24.I.1     | *         | Proband  | 47  |         |           |                      |                      |               |              | Missense      |
| 1.II.5     | *         | Proband  | 48  |         |           |                      |                      |               |              | Missense      |
| 333.II.3   | *         | Proband  | 52  |         |           |                      |                      |               |              | Missense      |
| 31.I.1     | *         | Proband  | 55  |         |           |                      |                      |               |              | Missense      |
| 301.I.1    | *         | Proband  | 55  |         |           |                      |                      |               |              | Missense      |
| 40.I.1     | *         | Proband  | 55  |         |           |                      |                      |               |              | Missense      |
| 349.II.4   | *         | Proband  | 66  |         |           |                      |                      |               |              | Missense      |
| 405        |           | Proband  | 9   |         |           |                      |                      |               |              | Null          |
| 406        |           | Proband  | 14  |         |           |                      |                      |               |              | Null          |
| 47.II.1    | *         | Proband  | 18  |         |           |                      |                      |               |              | Null          |
| 32.I.1     | *         | Proband  | 18  |         |           |                      |                      |               |              | Null          |
| 50.I.2     | *         | Proband  | 18  |         |           |                      |                      |               |              | Null          |
| 407        |           | Proband  | 18  |         |           |                      |                      |               |              | Null          |
| 408        | *         | Proband  | 19  |         |           |                      |                      |               |              | Null          |
| 409        | *         | Proband  | 19  |         |           |                      |                      |               |              | Null          |
| 33.III.1   | *         | Proband  | 20  |         |           |                      |                      |               |              | Null          |
| 291.I.1    | *         | Proband  | 21  |         |           |                      |                      |               |              | Null          |
| 410        | *         | Proband  | 21  |         |           |                      |                      |               |              | Null          |
| 20.I.3     | *         | Proband  | 21  |         |           |                      |                      |               |              | Null          |
| 26.I.1     | *         | Proband  | 21  |         |           |                      |                      |               |              | Null          |
| 390.I.1    | *         | Proband  | 22  |         |           |                      |                      |               |              | Null          |
| 49.III.2   | *         | Proband  | 23  |         |           |                      |                      |               |              | Null          |
| 38.I.1     | *         | Proband  | 24  |         |           |                      |                      |               |              | Null          |
| 203.I.1    | *         | Proband  | 26  |         |           |                      |                      |               |              | Null          |
| 39.I.1     | *         | Proband  | 26  |         |           |                      |                      |               |              | Null          |
| 22.I.1     | *         | Proband  | 27  |         |           |                      |                      |               |              | Null          |
| 340.II.1   | *         | Proband  | 30  |         |           |                      |                      |               |              | Null          |
| 362.I.1    | *         | Proband  | 32  |         |           |                      |                      |               |              | Null          |
| 8.I.1      | *         | Proband  | 33  |         |           |                      |                      |               |              | Null          |
| 401.I.1    | *         | Proband  | 33  |         |           |                      |                      |               |              | Null          |
| 350.I.1    | *         | Proband  | 34  |         |           |                      |                      |               |              | Null          |
| 13.II.1    | *         | Proband  | 34  |         |           |                      |                      |               |              | Null          |
| 233.I.1    | *         | Proband  | 34  |         |           |                      |                      |               |              | Null          |
| 347.I.1    | *         | Proband  | 36  |         |           |                      |                      |               |              | Null          |
| 386.II.1   | *         | Proband  | 38  |         |           |                      |                      |               |              | Null          |
| 357.I.1    | *         | Proband  | 39  |         |           |                      |                      |               |              | Null          |
| 30.II.1    | *         | Proband  | 44  |         |           |                      |                      |               |              | Null          |
| 413.I.1    | *         | Proband  | 44  |         |           |                      |                      |               |              | Null          |
| 411        | *         | Proband  | 46  |         |           |                      |                      |               |              | Null          |
| 27.I.1     | *         | Proband  | 50  |         |           |                      |                      |               |              | Null          |
| 129.I.1    | *         | Proband  | 53  |         |           |                      |                      |               |              | Null          |
| 49.I.1     | *         | Proband  | 62  |         |           |                      |                      |               |              | Null          |
| 53.V.3     | *         | Proband  | 21  |         |           |                      |                      |               |              | Regulatory    |
| 342.I.1    | *         | Proband  | 30  |         |           |                      |                      |               |              | Regulatory    |
| 48.III.14  | *         | Proband  | 32  |         |           |                      |                      |               |              | Regulatory    |
| 335.III.1  | *         | Proband  | 33  |         |           |                      |                      |               |              | Regulatory    |
| 6.II.1     | *         | Proband  | 36  |         |           |                      |                      |               |              | Regulatory    |
| 11.II.1    | *         | Proband  | 40  |         |           |                      |                      |               |              | Regulatory    |
| 25.II.1    | *         | Proband  | 41  |         |           |                      |                      |               |              | Regulatory    |
| 4.II.1     | *         | Proband  | 54  |         |           |                      |                      |               |              | Regulatory    |
| 401.I.2    | *         | Proband  | 61  |         |           |                      |                      |               |              | Regulatory    |
| 17.II.2    | *         | Relative | 8   |         |           |                      |                      |               |              | Missense      |
| 52.I.5     | *         | Relative | 16  |         |           |                      |                      |               |              | Missense      |
| 173.I.1    | *         | Relative | 16  |         |           |                      |                      |               |              | Missense      |
| 40.II.3    | *         | Relative | 19  |         |           |                      |                      |               |              | Missense      |
| 52.II.4    | *         | Relative | 19  |         |           |                      |                      |               |              | Missense      |
| 31.II.2    | *         | Relative | 29  |         |           |                      |                      |               |              | Missense      |
| 9.III.2    | *         | Relative | 29  |         |           |                      |                      |               |              | Missense      |
| 349.III.16 | *         | Relative | 36  |         |           |                      |                      |               |              | Missense      |
| 357.I.1    | *         | Relative | 43  |         |           |                      |                      |               |              | Missense      |
| 51.II.1    | *         | Relative | 54  |         |           |                      |                      |               |              | Missense      |
| 34.I.1     | *         | Relative | 55  |         |           |                      |                      |               |              | Missense      |
| 50.II.1    | *         | Relative | 23  |         |           |                      |                      |               |              | Null          |
| 39.I.2     | *         | Relative | 28  |         |           |                      |                      |               |              | Null          |
| 47.I.1     | *         | Relative | 54  |         |           |                      |                      |               |              | Null          |
| 13.II.1    | *         | Relative | 61  |         |           |                      |                      |               |              | Null          |
| 4.III.5    | *         | Relative | 15  |         |           |                      |                      |               |              | Regulatory    |
| 4.III.4    | *         | Relative | 17  |         |           |                      |                      |               |              | Regulatory    |
| 53.V.4     | *         | Relative | 18  |         |           |                      |                      |               |              | Regulatory    |
| 4.III.2    | *         | Relative | 29  |         |           |                      |                      |               |              | Regulatory    |
| 4.II.2     | *         | Relative | 31  |         |           |                      |                      |               |              | Regulatory    |
| 4.II.5     | *         | Relative | 44  |         |           |                      |                      |               |              | Regulatory    |
| 48.II.2    | *         | Relative | 53  |         |           |                      |                      |               |              | Regulatory    |
| 335.II.1   | *         | Relative | 59  |         |           |                      |                      |               |              | Regulatory    |
| 48.II.8    | *         | Relative | 63  |         |           |                      |                      |               |              | Regulatory    |
| 25.I.1     | *         | Relative | 66  |         |           |                      |                      |               |              | Regulatory    |
| 6.I.1      | *         | Relative | 67  |         |           |                      |                      |               |              | Regulatory    |
| 4.I.1      | *         | Relative | 78  |         |           |                      |                      |               |              | Regulatory    |

Radiographic findings in GATA2 deficiency probands and relatives grouped according to mutation type.

The findings are categorized by the typical patterns seen on chest CT in the GATA2 population described (3 young children in the cohort had no available CT). Finding displayed as present in solid grey or blank for absent. Probands and relatives are grouped separately, according mutation and sorted age. The numbering of the patients follows the scheme in Spinner, Sanchez, et al, Blood 2014

**e-Table 3.** Pulmonary function tests according to age and status (proband and relatives) FEV1 %, FVC%, and DLCO% adjust for hemoglobin in relatives and probands by decades of life.

| Age                         | <10yrs           |                 | 10-19yrs         |                 | 20-29yrs         |                 | 30-39 yrs.       |                 | 40-49 yrs.       |                | 50-59 yrs.       |                | >60yrs           |  |
|-----------------------------|------------------|-----------------|------------------|-----------------|------------------|-----------------|------------------|-----------------|------------------|----------------|------------------|----------------|------------------|--|
|                             | Proband<br>N=3   | Proband<br>N=13 | Relatives<br>N=7 | Proband<br>N=25 | Relatives<br>N=4 | Proband<br>N=26 | Relatives<br>N=3 | Proband<br>N=10 | Relatives<br>N=2 | Proband<br>N=5 | Relatives<br>N=4 | Proband<br>N=4 | Relatives<br>N=3 |  |
| FEV1%<br>Median<br>(IQ)     | 99<br>(91-107)   | 85*<br>(78-96)  | 103<br>(93-105)  | 91<br>(68-100)  | 90<br>(66-103)   | 82<br>(69-94)   | 93<br>(91-106)   | 71<br>(60-91)   | 104<br>(95-113)  | 82<br>(73-92)  | 88<br>(85-93)    | 80<br>(63-95)  | 91<br>(69-108)   |  |
| FVC%<br>Median<br>(IQ)      | 101<br>(100-103) | 99<br>(84-109)  | 103<br>(92-108)  | 93<br>(75-105)  | 97<br>(89-109)   | 91<br>(79--102) | 100<br>(94-113)  | 89*<br>(67-98)  | 108<br>(104-112) | 85<br>(66-91)  | 95<br>(89-98)    | 98<br>(72-102) | 93<br>(83-94)    |  |
| DLCO% adj<br>Median<br>(IQ) | 75<br>(69-82)    | 71<br>(58-77)   | 77<br>(66-82)    | 57<br>(49-74)   | 71<br>(57-86)    | 61*<br>(50-72)  | 81<br>(71-93)    | 66<br>(54-80)   | 69<br>(68-71)    | 58<br>(45-83)  | 79<br>(68-106)   | 62<br>(33-90)  | 60<br>(57-77)    |  |

Pulmonary function tests according to age, proband and relatives. FEV1 %, FVC%, and DLCO% adjusted for hemoglobin by decade.

\*P value <0.05
